# Supplementary material for: Mapping QTL Contributing to Variation in Posterior Lobe Morphology between Strains of Drosophila melanogaster
Source: PubMed Central journal article supplement (PMC5015897; doi:10.1371/journal.pone.0162573), 2016-09-08
Supplement: pone.0162573.s001.pdf [file pone.0162573.s001.pdf]

**Supplementary Data S1.** Summary of QTL and loci previously implicated in the genetic control of posterior lobe development and adult morphology in *Drosophila melanogaster*.

McNeil et al. (2011) - PMID: 22384345. See Table 3.

Identified three QTL for a measure of posterior lobe shape (PC1):

| QTL | Chr. | Cytology |
|-----|------|----------|
| Q1  | 2L   | 27E-29A  |
| Q2  | 2L   | 66B-69B  |
| Q3  | 3c   | 75F-86C  |

Takahara & Takahashi (2015) - PMID: 26182199. See Supplementary Tables 2, 3, and 4.

No sites were significant after formal correction for multiple tests, but a number of variants showed associations with measures of posterior lobe shape (PC1, PC2) and size at a nominal significance threshold of  $p < 10^{-5}$ .

PC1 (16 variants at  $p < 10^{-5}$ )

| Variant ID <sup>a</sup> | p-value <sup>b</sup> | Position (Release 6) <sup>c</sup> | Gene <sup>d</sup>                                               |
|-------------------------|----------------------|-----------------------------------|-----------------------------------------------------------------|
| 2L_11917838_SNP         | $8.7 \times 10^{-6}$ | 2L:11917838                       | <i>Pde1c</i> (FBgn0264815)                                      |
| 2L_16982042_SNP         | $3.5 \times 10^{-6}$ | 2L:16982042                       | <i>beat-IIIb</i> (FBgn0053179),<br><i>CG44406</i> (FBgn0265579) |
| 2L_17282029_SNP         | $9.3 \times 10^{-6}$ | 2L:17282029                       | -                                                               |
| 2L_582234_SNP           | $4.7 \times 10^{-6}$ | 2L:582234                         | -                                                               |
| 2R_16809817_INS         | $7.0 \times 10^{-6}$ | 2R:20922312                       | <i>Rx</i> (FBgn0020617)                                         |
| 2R_17146075_SNP         | $8.4 \times 10^{-6}$ | 2R:21258570                       | <i>Rgk3</i> (FBgn0085426)                                       |
| 2R_8919718_SNP          | $2.9 \times 10^{-6}$ | 2R:13032213                       | -                                                               |
| 3L_15296932_SNP         | $4.8 \times 10^{-6}$ | 3L:15303832                       | -                                                               |
| 3L_15297000_SNP         | $5.2 \times 10^{-6}$ | 3L:15303900                       | -                                                               |
| 3L_15297065_SNP         | $6.6 \times 10^{-7}$ | 3L:15303965                       | -                                                               |
| 3L_16826245_SNP         | $1.3 \times 10^{-6}$ | 3L:16833145                       | -                                                               |
| 3L_9276471_SNP          | $1.1 \times 10^{-6}$ | 3L:9283371                        | <i>GluRIB</i> (FBgn0264000)                                     |
| 3R_15744495_SNP         | $5.8 \times 10^{-6}$ | 3R:19918773                       | <i>CG4770</i> (FBgn0038751)                                     |
| 3R_19183951_SNP         | $4.6 \times 10^{-6}$ | 3R:23358229                       | <i>Sec13</i> (FBgn0024509)                                      |
| 3R_19184076_SNP         | $2.9 \times 10^{-7}$ | 3R:23358354                       | <i>Sec13</i> (FBgn0024509)                                      |
| X_20429265_INS          | $8.9 \times 10^{-6}$ | X:20558238                        | <i>RunxB</i> (FBgn0259162)                                      |

PC2 (14 variants at  $p < 10^{-5}$ )

| Variant ID <sup>a</sup> | p-value <sup>b</sup> | Position (Release 6) <sup>c</sup> | Gene <sup>d</sup>                                      |
|-------------------------|----------------------|-----------------------------------|--------------------------------------------------------|
| 2L_16460631_SNP         | $1.0 \times 10^{-5}$ | 2L:16460631                       | -                                                      |
| 2L_5540863_SNP          | $1.8 \times 10^{-6}$ | 2L:5540863                        | <i>Hel25E</i> (FBgn0014189)                            |
| 2R_18594569_SNP         | $4.0 \times 10^{-6}$ | 2R:22707064                       | <i>Obp58d</i> (FBgn0034770)                            |
| 2R_18659021_SNP         | $9.9 \times 10^{-6}$ | 2R:22771516                       | <i>CG42260</i> (FBgn0259145)                           |
| 2R_18914361_SNP         | $2.9 \times 10^{-6}$ | 2R:23026838                       | <i>twi</i> (FBgn0003900), <i>CG42741</i> (FBgn0261705) |
| 2R_7583208_SNP          | $1.0 \times 10^{-5}$ | 2R:11695703                       | <i>CG13197</i> (FBgn0062449)                           |
| 3L_7290732_SNP          | $5.5 \times 10^{-7}$ | 3L:7297632                        | <i>unc-13-4A</i> (FBgn0035756)                         |
| 3R_10150581_SNP         | $3.8 \times 10^{-7}$ | 3R:14324859                       | <i>Afti</i> (FBgn0038223)                              |
| 3R_11532259_SNP         | $3.5 \times 10^{-6}$ | 3R:15706537                       | <i>CG5404</i> (FBgn0038354)                            |
| 3R_11532260_SNP         | $1.5 \times 10^{-6}$ | 3R:15706538                       | <i>CG5404</i> (FBgn0038354)                            |
| 3R_11532266_MNP         | $3.3 \times 10^{-6}$ | 3R:15706544                       | <i>CG5404</i> (FBgn0038354)                            |
| 3R_11532271_SNP         | $2.5 \times 10^{-6}$ | 3R:15706549                       | <i>CG5404</i> (FBgn0038354)                            |
| 3R_2137747_SNP          | $4.3 \times 10^{-6}$ | 3R:6312025                        | <i>Osi17</i> (FBgn0037427)                             |
| X_16331129_DEL          | $6.2 \times 10^{-6}$ | X:16437096                        | <i>hang</i> (FBgn0026575)                              |

Size (15 variants at  $p < 10^{-5}$ )

| Variant ID <sup>a</sup> | p-value <sup>b</sup> | Position (Release 6) <sup>c</sup> | Gene <sup>d</sup>            |
|-------------------------|----------------------|-----------------------------------|------------------------------|
| 2L_1823396_SNP          | $4.2 \times 10^{-6}$ | 2L:1823396                        | -                            |
| 2L_7045893_SNP          | $8.5 \times 10^{-6}$ | 2L:7045893                        | <i>milt</i> (FBgn0262872)    |
| 2R_13646097_DEL         | $4.8 \times 10^{-6}$ | 2R:17758592                       | <i>HLH54F</i> (FBgn0022740)  |
| 2R_13815024_SNP         | $9.1 \times 10^{-6}$ | 2R:17927519                       | -                            |
| 2R_13815048_SNP         | $2.8 \times 10^{-6}$ | 2R:17927543                       | -                            |
| 3L_11031740_INS         | $5.3 \times 10^{-6}$ | 3L:11038640                       | <i>CG43693</i> (FBgn0263776) |
| 3L_11031783_SNP         | $8.4 \times 10^{-6}$ | 3L:11038683                       | <i>CG43693</i> (FBgn0263776) |
| 3L_11037323_DEL         | $4.9 \times 10^{-6}$ | 3L:11044223                       | <i>CG43693</i> (FBgn0263776) |
| 3L_11037405_SNP         | $2.3 \times 10^{-6}$ | 3L:11044305                       | <i>CG43693</i> (FBgn0263776) |
| 3L_12148634_SNP         | $2.5 \times 10^{-6}$ | 3L:12155534                       | <i>Nrx-IV</i> (FBgn0013997)  |
| 3L_12175730_SNP         | $2.4 \times 10^{-7}$ | 3L:12182630                       | <i>CAH2</i> (FBgn0027843)    |
| 3L_13764854_SNP         | $8.7 \times 10^{-6}$ | 3L:13771754                       | <i>bru-3</i> (FBgn0264001)   |
| 3L_13764855_SNP         | $8.3 \times 10^{-6}$ | 3L:13771755                       | <i>bru-3</i> (FBgn0264001)   |
| 3L_20214515_INS         | $8.0 \times 10^{-6}$ | 3L:20221415                       | -                            |
| 3R_14913820_SNP         | $3.3 \times 10^{-6}$ | 3R:19088098                       | <i>cdi</i> (FBgn0004876)     |

<sup>a</sup> Variant ID from DGRP analysis software (dgrp2.gnets.ncsu.edu/). The first component is the chromosome on which the variant resides, the second is the position in Release 5 of the *D. melanogaster* reference genome, and the third is the type of variant (SNP, INS, DEL).

<sup>b</sup> The p-value of the association test.

<sup>c</sup> The position of the variant on Release 6 of the reference genome (converted from Release 5 positions via flybase.org/static\_pages/downloads/COORD.html).

<sup>d</sup> The name (and FlyBase ID) of any gene in which the variant resides. A "-" implies the variant does not reside in a gene.

Chatterjee et al. (2011) - PMID: 21343364.

Found 23 genes with male- or female-biased gene expression in the genital disc across three developmental timepoints. (Two of these genes - *CG4267* and *CG31686* - have since been merged into the single gene *CG4267*.)

| <i>Chr.</i> | <i>Gene Name</i> | <i>FlyBase ID</i> |
|-------------|------------------|-------------------|
| X           | <i>CG4766</i>    | FBgn0027546       |
| X           | <i>Nep1</i>      | FBgn0029843       |
| X           | <i>lz</i>        | FBgn0002576       |
| X           | <i>FucTC</i>     | FBgn0044872       |
| 2           | <i>al</i>        | FBgn0000061       |
| 2           | <i>CG4267</i>    | FBgn0264979       |
| 2           | <i>CG31686</i>   | FBgn0264979       |
| 2           | <i>msl-2</i>     | FBgn0005616       |
| 2           | <i>salr</i>      | FBgn0000287       |
| 2           | <i>ap</i>        | FBgn0267978       |
| 2           | <i>Wnt2</i>      | FBgn0004360       |
| 2           | <i>Poxn</i>      | FBgn0003130       |
| 3           | <i>bab1</i>      | FBgn0004870       |
| 3           | <i>toe</i>       | FBgn0036285       |
| 3           | <i>eyg</i>       | FBgn0000625       |
| 3           | <i>caup</i>      | FBgn0015919       |
| 3           | <i>AP-2</i>      | FBgn0261953       |
| 3           | <i>dsx</i>       | FBgn0000504       |
| 3           | <i>Ctr1B</i>     | FBgn0062412       |
| 3           | <i>abd-A</i>     | FBgn0000014       |
| 3           | <i>bnl</i>       | FBgn0014135       |
| 3           | <i>Dr</i>        | FBgn0000492       |

Glassford et al. (2015) - PMID: 26343453.

Highlighted a number of genes expressed in the developing genital disc, and those having effects on the posterior lobe following RNAi.

| <i>Chr.</i> | <i>Gene Name</i> | <i>FlyBase ID</i> |
|-------------|------------------|-------------------|
| X           | <i>dome</i>      | FBgn0043903       |
| X           | <i>hop</i>       | FBgn0004864       |
| X           | <i>upd1</i>      | FBgn0004956       |
| 2L          | <i>eya</i>       | FBgn0000320       |
| 2L          | <i>salm</i>      | FBgn0261648       |
| 2R          | <i>en</i>        | FBgn0000577       |
| 2R          | <i>Poxn</i>      | FBgn0003130       |
| 3L          | <i>RhoGEF64C</i> | FBgn0035574       |
| 3R          | <i>Abd-B</i>     | FBgn0000015       |
| 3R          | <i>Cad86C</i>    | FBgn0261053       |
| 3R          | <i>crb</i>       | FBgn0259685       |
| 3R          | <i>ems</i>       | FBgn0000576       |
| 3R          | <i>Stat92E</i>   | FBgn0016917       |

Tanaka et al. (2015) - PMID: 25783699. See Figure 4.

Identified several genes that influence posterior lobe morphology in *D. melanogaster* via RNAi. These candidates were selected based on their presence within regions of *D. mauritiana* that when introgressed into a *D. simulans* background affect genital morphology.

| <i>Chr.</i> | <i>Gene Name</i> | <i>FlyBase ID</i> |
|-------------|------------------|-------------------|
| 3           | <i>CG6673</i>    | FBgn0035906       |
| 3           | <i>CG11652</i>   | FBgn0036194       |
| 3           | <i>CG14130</i>   | FBgn0036210       |
| 3           | <i>CG14835</i>   | FBgn0035782       |
| 3           | <i>CG14838</i>   | FBgn0035799       |
| 3           | <i>CG32055</i>   | FBgn0052055       |
| 3           | <i>CG32081</i>   | FBgn0052081       |
| 3           | <i>CG32082</i>   | FBgn0052082       |
| 3           | <i>dally</i>     | FBgn0263930       |
| 3           | <i>iPLA2-VIA</i> | FBgn0036053       |
| 3           | <i>Mcm7</i>      | FBgn0020633       |
| 3           | <i>Mob2</i>      | FBgn0259481       |
| 3           | <i>msl-3</i>     | FBgn0002775       |
| 3           | <i>Prm</i>       | FBgn0003149       |
| 3           | <i>Rac1</i>      | FBgn0010333       |
| 3           | <i>Surf1</i>     | FBgn0029117       |
| 3           | <i>wls</i>       | FBgn0036141       |
