# Supplementary material for: Mapping QTL Contributing to Variation in Posterior Lobe Morphology between Strains of Drosophila melanogaster
Source: PubMed Central journal article supplement (PMC5015897; doi:10.1371/journal.pone.0162573), 2016-09-08
Supplement: pone.0162573.s002.pdf [file pone.0162573.s002.pdf]

**Supplementary Figure S1.** Posterior lobe phenotype acquisition workflow.

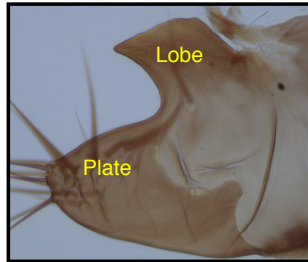

**STEP 1**

Take image of posterior lobe & lateral plate

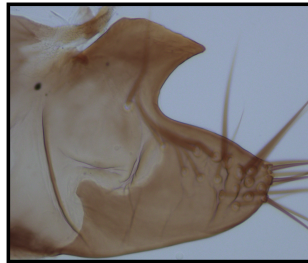

**STEP 2**

If necessary, flip/rotate image such that “point” of lobe points clockwise

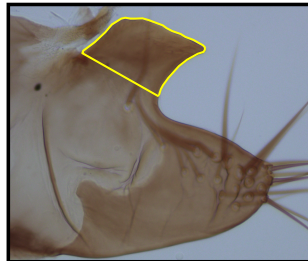

**STEP 3**

Using *ImageJ* define outline of lobe, closing the outline with an artificial baseline

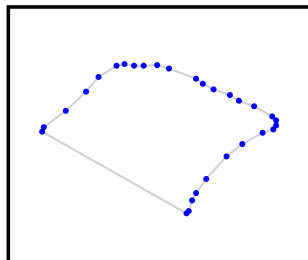

**STEP 4**

Save the series of Cartesian coordinates defining lobe shape/size

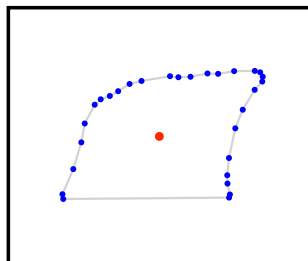

**STEP 5**

Rotate the coordinate series so the baseline is horizontal, and translate the coordinates so that the centroid of the outline is at the origin (•)
