# Supplementary material for: Mapping QTL Contributing to Variation in Posterior Lobe Morphology between Strains of Drosophila melanogaster
Source: PubMed Central journal article supplement (PMC5015897; doi:10.1371/journal.pone.0162573), 2016-09-08

**Supplementary Figure S5.** Subset of posterior lobes sorted by the value of PC1 shape phenotype. Four lobes from each parental strain are presented (SS, blue; T7, red), along with 88 lobes from recombinant individuals (black). The number within each image is the PC1 ( $\times 10^4$ ) value assigned to the lobe.

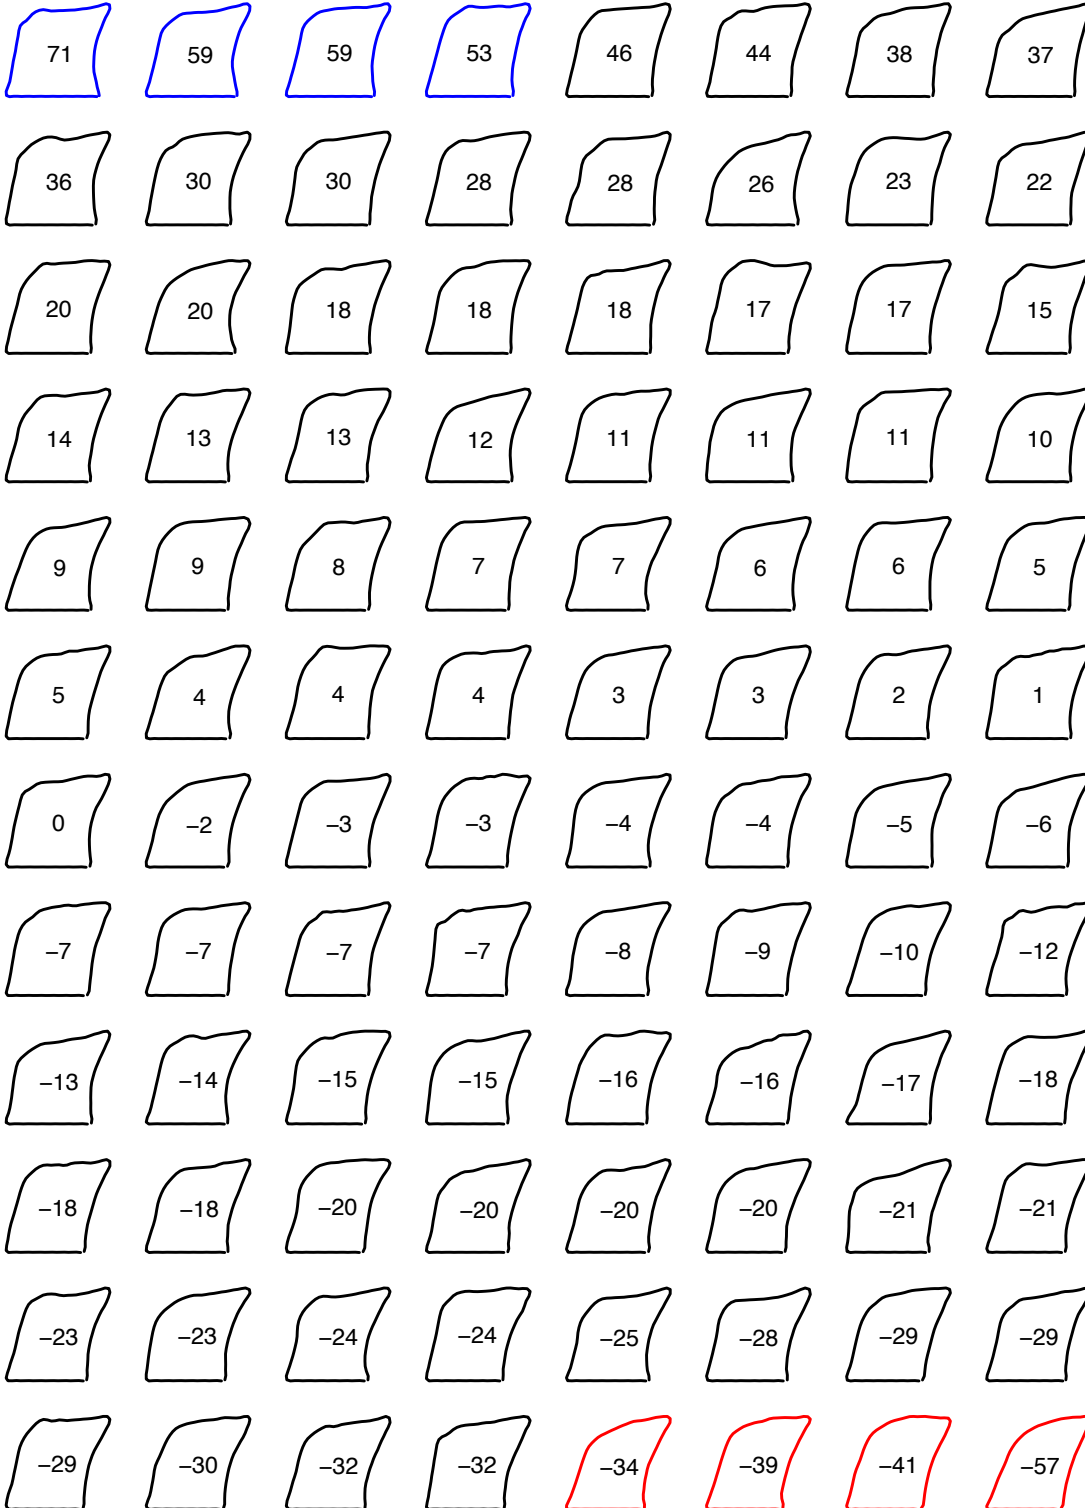

Supplement: pone.0162573.s006.pdf [file pone.0162573.s006.pdf]
