# Supplementary material for: Mapping QTL Contributing to Variation in Posterior Lobe Morphology between Strains of Drosophila melanogaster
Source: PubMed Central journal article supplement (PMC5015897; doi:10.1371/journal.pone.0162573), 2016-09-08
Supplement: pone.0162573.s012.pdf [file pone.0162573.s012.pdf]

**Supplementary Table S4.** Positions of QTL mapped for all 7 traits.

| Trait      | QTL <sup>a</sup> | LOD  | Chr | Interval (cM) <sup>b</sup> | Interval (Mb) <sup>b</sup>  |
|------------|------------------|------|-----|----------------------------|-----------------------------|
| lobeArea   | Q1 <sup>3</sup>  | 5.2  | 3L  | 141-158                    | 17.4-21.7                   |
| lobeHeight | Q1 <sup>1</sup>  | 2.7  | X   | 1-45                       | 3.5-9.3                     |
| lobeHeight | Q2 <sup>2</sup>  | 4.6  | 2L  | 25-45                      | 3.3-5.3                     |
| lobeHeight | Q3 <sup>3</sup>  | 4.4  | 3L  | 142-166                    | 3L:17.8-3R:8.3 <sup>c</sup> |
| lobeWidth  | Q1 <sup>2</sup>  | 5.8  | 2L  | 12-51                      | 13.8-16.4                   |
| lobeWidth  | Q2               | 3.8  | 2L  | 135-149                    | 2.0-5.6                     |
| HWratio    | Q1 <sup>1</sup>  | 2.7  | X   | 1-90                       | 3.5-12.5                    |
| HWratio    | Q2 <sup>2</sup>  | 10.6 | 2L  | 36-46                      | 4.0-5.4                     |
| PC1        | Q1               | 2.9  | X   | 106-165                    | 13.6-19.4                   |
| PC1        | Q2 <sup>2</sup>  | 9.8  | 2L  | 36-50                      | 4.1-5.6                     |
| PC1        | Q3               | 8.6  | 3L  | 85-119                     | 10.4-13.7                   |
| PC1        | Q4               | 4.6  | 3R  | 262-277                    | 21.7-23.7                   |
| PC2        | Q1               | 4.3  | 3L  | 34-72                      | 4.5-9.5                     |
| PC2        | Q2 <sup>3</sup>  | 6.0  | 3L  | 146-155                    | 18.7-21.2                   |
| PC3        | Q1               | 4.2  | 2L  | 64-85                      | 7.0-9.5                     |

<sup>a</sup> The superscript numbers indicate those QTL intervals that physically overlap. For instance, both QTL labeled "1" overlap with each other. QTL without a superscript label are uniquely found for a single trait.

<sup>b</sup> QTL intervals are defined by 2-LOD drops from the peaks. Genetic distance is given on the expanded map (map distances on the typical *D. melanogaster* genetic map will be approximately 3 times shorter.) Physical distance is provided relative to Release 6 of the genome.

<sup>c</sup> This QTL interval overlaps the chromosome 3 centromere, so the proximal and distal ends of the interval are on different chromosome arms.
